# Supplementary material for: Xuebijing Injection Alleviates Pam3CSK4-Induced Inflammatory Response and Protects Mice From Sepsis Caused by Methicillin-Resistant Staphylococcus aureus
Source: PubMed Central journal article supplement (PMC7047170; doi:10.3389/fphar.2020.00104), 2020-02-21
Supplement: DataSheet_1.pdf [file DataSheet_1.pdf]

## SUPPLEMENTARY MATERIAL

### **Xuebijing Injection Alleviates Pam3CSK4-induced Inflammatory Response and Protects Mice from Sepsis Caused by Methicillin-resistant *Staphylococcus aureus***

Tiantian Li<sup>1, †</sup>, Yiming Qian<sup>2, †</sup>, Zhulei Miao<sup>1</sup>, Peiyong Zheng<sup>3</sup>, Ting Shi<sup>1</sup>, Xinru Jiang<sup>1</sup>, Lingyun Pan<sup>4</sup>, Fenghua Qian<sup>2</sup>, Guizhen Yang<sup>1</sup>, Huazhang An<sup>5,\*</sup>, Yuejuan Zheng<sup>1,\*</sup>

<sup>1</sup> Department of Immunology and Microbiology, School of Basic Medical Sciences, Shanghai University of Traditional Chinese Medicine, Shanghai 201203, China

<sup>2</sup> Department of Emergency, Yueyang Hospital of Integrated Traditional Chinese and Western Medicine, affiliated to Shanghai University of Traditional Chinese Medicine, Shanghai 200437, China

<sup>3</sup> Institute of Digestive Diseases, Longhua Hospital affiliated to Shanghai University of Traditional Chinese Medicine, Shanghai 200032, China

<sup>4</sup> Experiment Center for Science and Technology, Shanghai University of Traditional Chinese Medicine, Shanghai 201203, China

<sup>5</sup> Clinical Cancer Institute, Center of Translational Medicine, Second Military Medical University, Shanghai 200433, China

#### **\*Correspondence:**

Yuejuan Zheng

13641776412@163.com or zhengyj@shutum.edu.com

Huazhang An

anhz@immunol.org

† These authors have contributed equally to this work.

#### **Materials and Methods**

## **Reagents**

Mueller-Hinton agar was purchased from Thermo Fisher Scientific (Waltham, MA, USA). Levofloxacin, meropenem, vancomycin and oxacillin were purchased from National Institutes for Food and Drug Control (Beijing, China).

## **Minimum Inhibitory Concentrations Testing**

Two-fold serial dilution method was adopted to determine MICs according to the Clinical and Laboratory Standards Institute (CLSI) guidelines. Firstly, 120  $\mu\text{L}$  of different concentrations of oxacillin (0.031 - 64  $\mu\text{g}/\text{mL}$ ), vancomycin (0.125 - 64  $\mu\text{g}/\text{mL}$ ), meropenem (0.004 - 64  $\mu\text{g}/\text{mL}$ ) and levofloxacin (0.004 - 64  $\mu\text{g}/\text{mL}$ ) were mixed with 1.68 mL of agar medium, respectively. The quality control strains of bacteria including *Escherichia coli* (*E. coli*) (ATCC 25922), *Pseudomonas aeruginosa* (*P. aeruginosa*) (ATCC 27853) and *S. aureus* (ATCC 29213) were planted on the surface of agar plates in 3 duplicates. MICs were got after incubation for 18 h. Secondly, one milliliter of different concentrations of XBJ (0.1 - 100  $\mu\text{L}/\text{mL}$ ) in agar were prepared and then were mixed with 14 mL of agar medium. Eight common clinical bacterial strains including *E.coli* (ATCC 25922), *P. aeruginosa* (ATCC 27853), *S. aureus* (ATCC 29213), *K. pneumoniae* (ATCC 700603), carbapenem-resistant *Klebsiella pneumoniae* (CRKP) (HS11286), hypervirulent *Klebsiella pneumoniae* (hvKP) (GN-3), MRSA (ST239), *S. aureus* (ATCC 6538) were planted on the surface of agar in 3 duplicates. MICs were read after incubation for 18 h.

## **Cell proliferation assay**

Cell viability of Raw264.7 in the presence of XBJ was measured using cell proliferation assay with cell counting kit-8 (CCK-8) according to the manufacturer's instructions (Genegen Biotech, Shanghai, China). Briefly, Raw264.7 cells were seeded in 96-well plates at a density of  $2 \times 10^5/\text{mL}$  and incubated at 37 °C for 24 h. The cell culture medium was subsequently replaced by medium containing different concentrations of XBJ (0, 3, 10, 30, 100  $\mu\text{L}/\text{mL}$ ). At the point of 24, 48 and 72 h, the optical density of each well was determined at 450 nm (with the reference wavelength of 650 nm) using a Synergy 2 Microplate Reader (Bio-Tek, Vermont, USA). At 2 h before detection, CCK reagent was added into the medium (10  $\mu\text{L}/\text{well}$ ) for

incubation. The amount of Raw264.7 was expressed as a percentage of untreated negative control.

## RESULTS

Li T, et al. Supplementary Figure S1

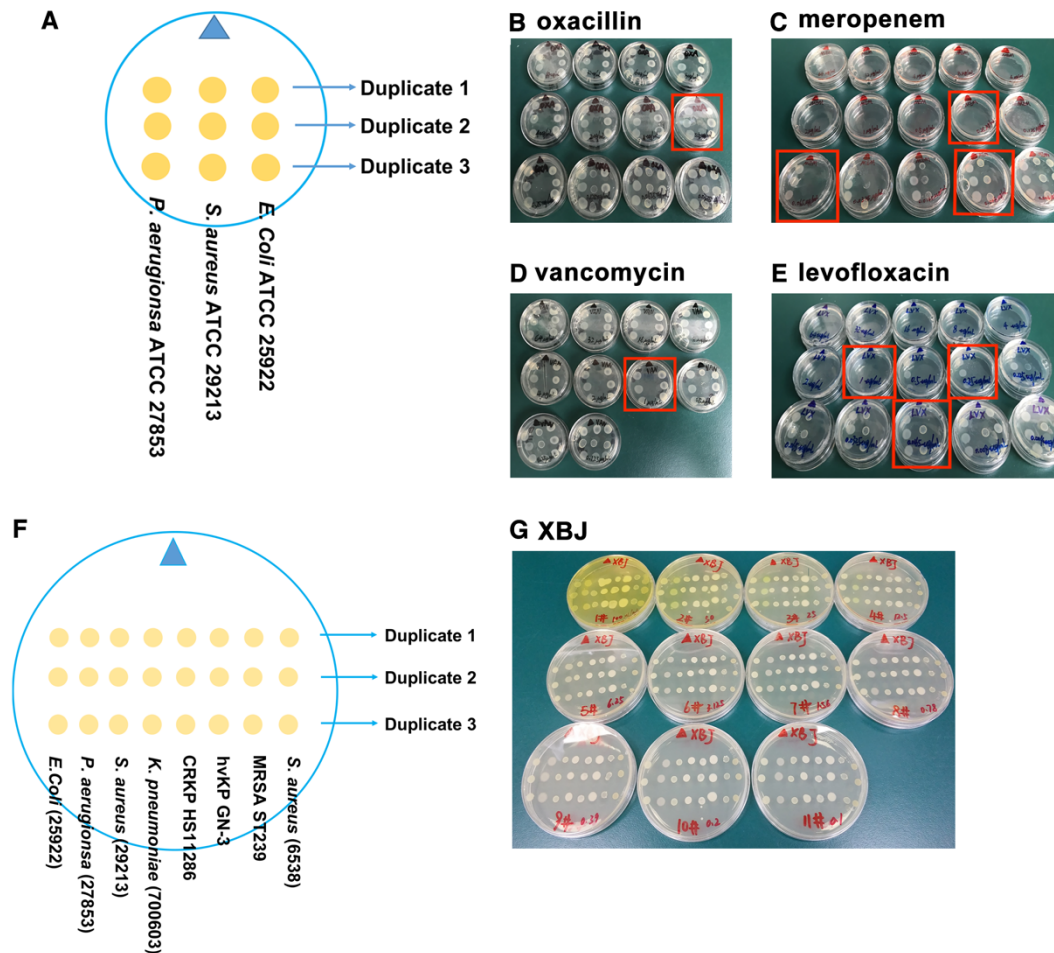

**FIGURE S1** XBJ had no antibacterial effects within the examined concentrations (0.1 - 100  $\mu\text{L/mL}$ ). (**A**, **F**) The diagram of strains being planted on the surface of agar plates. (**B-E**) The red box indicated MICs data of quality control strains of bacteria to four examined antibiotics. (**G**) All examined clinical strains of bacteria grew on agar plates containing different concentrations of XBJ (0.1 - 100  $\mu\text{L/mL}$ ).

Li T, et al. Supplementary Figure S2

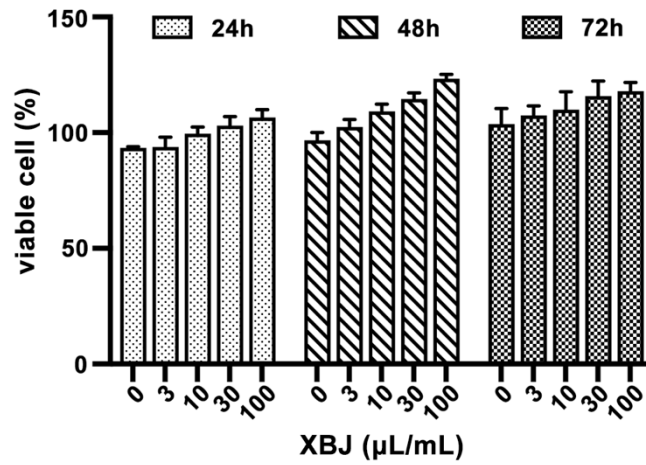

**FIGURE S2** Effect of XBJ on the viability of Raw264.7. Cell proliferation assay was conducted to assess the cytotoxic effect of XBJ on Raw264.7. Data were shown as means  $\pm$  SD (n=4).

Li T, et al. Supplementary Figure S3

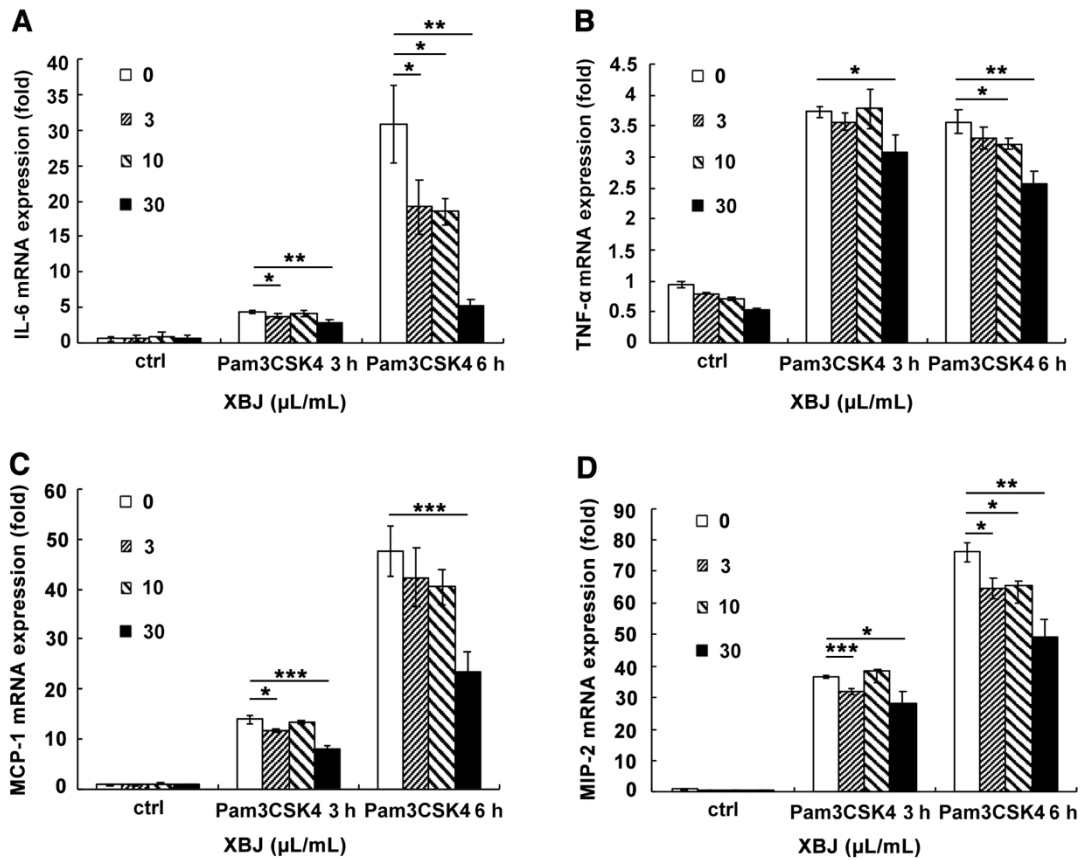

**FIGURE S3** XBJ inhibited the production of Pam3CSK4-induced inflammatory mediators in Raw264.7. Raw264.7 cells were seeded ( $2 \times 10^5$  cells/well) in 24-well

plates overnight and stimulated by Pam3CSK4 (100 ng/mL) and different concentrations of XBJ for 3 or 6 h. IL-6 (A), TNF- $\alpha$  (B), MCP-1 (C) and MIP-2 (D) mRNA expression was examined by qRT-PCR. Data were shown as mean  $\pm$  SD (n=3). \*, \*\*, \*\*\*Significantly different at  $p < 0.05$ ,  $p < 0.01$ , and  $p < 0.001$ , respectively.

Li T, et al. Supplementary Figure S4

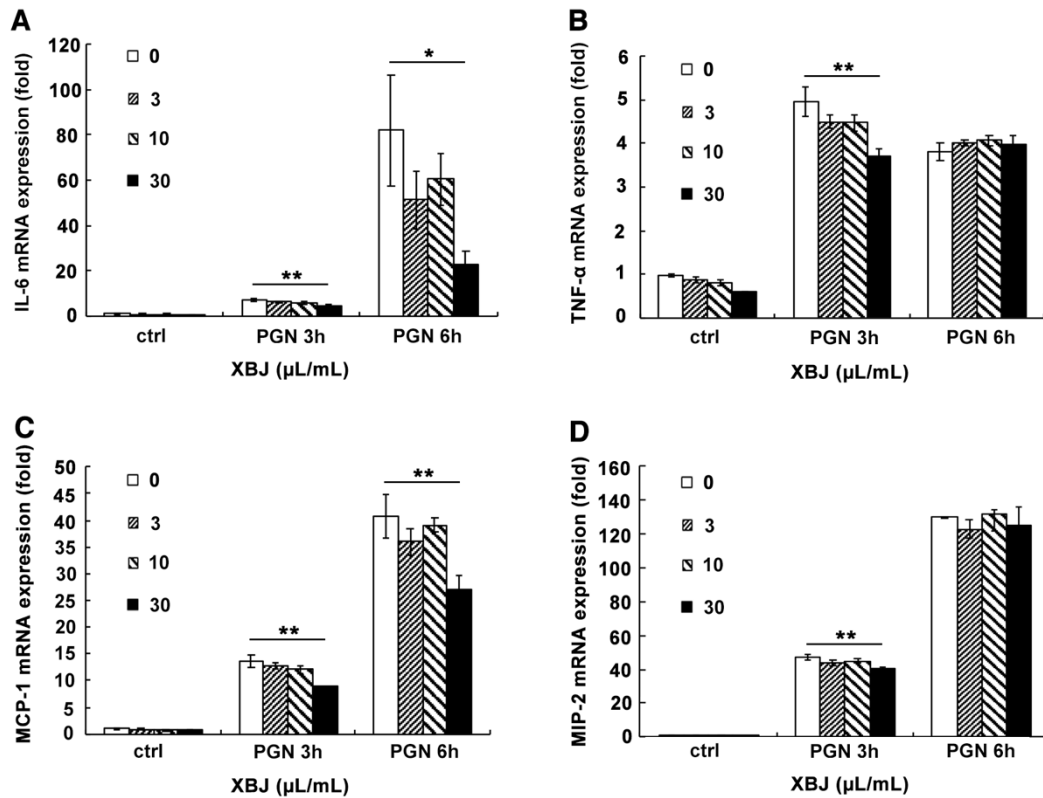

**FIGURE S4** High dose of XBJ inhibited the production of PGN-induced inflammatory mediators in Raw264.7. Raw264.7 cells were seeded ( $2 \times 10^5$  cells/well) in 24-well plates overnight and stimulated by PGN (25  $\mu\text{g/mL}$ ) and different concentrations of XBJ for 3 or 6 h. IL-6 (A), TNF- $\alpha$  (B), MCP-1 (C) and MIP-2 (D) mRNA expression was examined by qRT-PCR. Data were shown as mean  $\pm$  SD (n=3). \*, \*\*Significantly different at  $p < 0.05$  and  $p < 0.01$ , respectively.

**Table S1** MRM parameters of 9 compounds.

| Compounds               | Q1    | Q3    | $t_R$ /min | DP(V) | CE(V) | CXP(V) |
|-------------------------|-------|-------|------------|-------|-------|--------|
| PAE                     | 479.2 | 121   | 5.19       | -100  | -20   | -15    |
| HSYA                    | 611.2 | 491.1 | 4.3        | -60   | -34   | -34    |
| ferulic acid            | 192.8 | 133.9 | 5.63       | -31   | -23   | -10    |
| tanshinone II A         | 295.2 | 277.1 | 10.81      | 58    | 27    | 21     |
| salvianolic acid B      | 717.3 | 519.2 | 6.25       | -100  | -24   | -22    |
| benzoylpaeoniflorin     | 583.3 | 121.1 | 7.31       | -54   | -24   | -15    |
| alibiflorin             | 481.4 | 197.1 | 5.03       | 150   | 17    | 19     |
| senkyunolide I          | 225.1 | 207.1 | 6.58       | 80    | 11    | 19     |
| protocatechuic aldehyde | 137   | 108   | 4.17       | -100  | -27   | -15    |

**Table S2** MICs of quality control strains of bacteria to four examined antibiotics.

|                      | oxacillin          | meropenem             | vancomycin   | levofloxacin          |
|----------------------|--------------------|-----------------------|--------------|-----------------------|
| <i>S. aureus</i>     | 0.25<br>(0.12-0.5) | 0.065<br>(0.03-0.12)  | 1<br>(0.5-2) | 0.25<br>(0.06-0.5)    |
| <i>E. coli</i>       | invalid            | 0.008<br>(0.008-0.06) | invalid      | 0.016<br>(0.008-0.06) |
| <i>P. aeruginosa</i> | invalid            | 0.25<br>(0.25-1)      | invalid      | 1<br>(0.5-4)          |

The values in brackets are concentration ranges recommended by the CLSI.
